1 **Species-specific recognition of Sulfolobales mediated by UV-inducible pili and S-layer**  
2 **glycosylation patterns**

3 Marleen van Wolferen<sup>1</sup>, Asif Shajahan<sup>2</sup>, Kristina Heinrich<sup>1</sup>, Susanne Brenzinger<sup>3</sup>, Ian M.  
4 Black<sup>2</sup>, Alexander Wagner<sup>1</sup>, Ariane Briegel<sup>3</sup>, Parastoo Azadi<sup>2</sup>, and Sonja-Verena Albers<sup>1\*</sup>

5

6

7 <sup>1</sup>Molecular Biology of Archaea, Institute of Biology II - Microbiology, University of  
8 Freiburg, Schaezlestrasse 1, 79104, Freiburg, Germany

9 <sup>2</sup>Complex Carbohydrate Research Center, The University of Georgia, 315 Riverbend Road,  
10 Athens, GA, 30602, USA.

11 <sup>3</sup>Institute of Biology, Leiden University, Sylviusweg 72, 2333 BE, Leiden, The Netherlands

12

13 \*Correspondence to S.V. Albers, e-mail: [sonja.albers@biologie.unifreiburg.de](mailto:sonja.albers@biologie.unifreiburg.de), tel.:

14 +49(0)761 203 2630

15 Keywords: type IV pili, archaea, Sulfolobus, DNA exchange, glycosylation

16

17

18 **Abstract**

19 The UV-inducible pili system of Sulfolobales (Ups) mediates the formation of species-  
20 specific cellular aggregates. Within these aggregates, cells exchange DNA in order to repair  
21 DNA double strand breaks via homologous recombination. Substitution of the *S.*  
22 *acidocaldarius* pilin subunits UpsA and UpsB with their homologs from *Sulfolobus tokodaii*  
23 showed that these subunits facilitate species-specific aggregation. A region of low  
24 conservation within the UpsA homologs is primarily important for this specificity.  
25 Aggregation assays in the presence of different sugars showed the importance of *N*-  
26 glycosylation in the recognition process. In addition, the *N*-glycan decorating the S-layer of *S.*  
27 *tokodaii* is different from the one of *S. acidocaldarius*. Therefore, each *Sulfolobus* species  
28 seems to have developed a unique UpsA binding pocket and unique *N*-glycan composition to  
29 ensure aggregation and consequently also DNA exchange with cells from only the same  
30 species, which is essential for DNA repair by homologous recombination.

31

32 **Importance**

33 Type IV pili can be found on the cell surface of many archaea and bacteria where they play  
34 important roles in different processes. The Ups-pili from the crenarchaeal Sulfolobales  
35 species are essential in establishing species-specific mating partners, ensuring genome  
36 stability. With this work, we show that different *Sulfolobus* species have species-specific  
37 regions in their Ups-pilin subunits, which allow them to interact only with cells from the  
38 same species. Additionally, different *Sulfolobus* species all have unique S-layer *N*-  
39 glycosylation patterns. We propose that the unique features of each species allow the  
40 recognition of specific mating partners. This knowledge for the first time gives insights into  
41 the molecular basis of archaeal self-recognition.

42

43

## 44 **Introduction**

45 Type IV pili (T4P) are cell surface appendages that can be found on the cell-surfaces of many  
46 bacteria and archaea (1, 2). They have been implicated in motility, secretion, DNA  
47 transformation, adhesion to surfaces and the formation of intercellular associations (3, 4). In  
48 bacteria, many examples of T4P with cellular-binding properties have been described. The  
49 major pilin subunit PilE from *Neisseria* T4P, was shown to bind endothelial cells and  
50 hemagglutinate erythrocytes whereas the *Neisseria* minor pilin PilV is essential for adherence  
51 to host cells (5–10). Additionally, major pilin PilA from *Myxococcus xanthus* binds to self-  
52 produced exopolysaccharides, subsequent retraction of the T4P allows gliding motility and  
53 fruiting body formation (11, 12). T4P also form intercellular connections that are essential for  
54 conjugational exchange of DNA. For instance, PAPI-1 encoded T4P bring *Pseudomonas*  
55 *aeruginosa* cells in close proximity by binding to lipopolysaccharides of the recipient cells  
56 and thereby promote exchange of PAPI-1 DNA (13, 14).

57 In archaea, several gene clusters have been found to encode T4P-like structures (4, 15–  
58 19). The best-characterized archaeal T4P-like structure is the archaellum, which is essential  
59 for swimming motility (4, 19–21). However, little is known about the role and mode of  
60 action of archaeal non-archaellum T4P in attachment to biotic or abiotic surfaces. T4P from  
61 the thermophilic crenarchaeon *Sulfolobus acidocaldarius* (Aap: archaeal adhesive pili) and  
62 the euryarchaea *Haloferax volcanii* and *Methanococcus maripaludis* were shown to be  
63 involved in attachment to surfaces (22–27). However, their exact mode of binding has not  
64 been studied. Next to Aap-pili, Ups-pili can be found in Sulfolobales (UV inducible pili of  
65 Sulfolobales) (28–31). These T4P assemble upon treatment of the cells with UV-stress and  
66 other DNA double strand break inducing agents. They are crucial in cellular self-interactions  
67 thereby mediating the formation of species-specific cellular aggregates (32, 33). Within these

68 aggregates, cells are able to exchange chromosomal DNA using the Ced-system  
69 (Crenarchaeal exchange of DNA), suggesting a community based DNA repair system via  
70 homologous recombination (32, 34). Interestingly, the Ced-system was found to function  
71 independently of the Ups-pili, even though both systems are essential for DNA transport (35).

72 The *ups*-operon encodes two pilin subunits with a class III signal peptide: UpsA and  
73 UpsB (29). Deletion mutants of either *upsA* or *upsB* still form pili (though less and smaller),  
74 but do not aggregate after UV induction. The pilins are therefore both suggested to be major  
75 subunits forming mixed Ups-pili (31, 32) . While the importance of Ups-pili in cellular  
76 recognition is known, the underlying molecular mechanism of the species-specific cellular  
77 aggregation of *Sulfolobus* species has not been determined.

78 In this study, we investigated the role of Ups-pili in species-specific aggregation on a  
79 molecular level. To this end, *in vivo* chimera mutants were constructed in which we  
80 exchanged (parts of) the genes encoding the pilin subunits UpsA and UpsB of *S.*  
81 *acidocaldarius* and *S. tokodaii*. By using these strains in aggregation assays and fluorescence  
82 in situ hybridization (FISH) experiments, we were able to assign a specific region of UpsA to  
83 be required for species-specific cell aggregation of archaeal cells. Furthermore, aggregation  
84 assays in the presence of different sugars suggested a role of *N*-glycosylation in cellular  
85 recognition. Glycan analysis on the thus far unstudied *S. tokodaii* S-layer showed a different  
86 *N*-glycan composition compared to that of other *Sulfolobus* species. Based on these  
87 experiments, we propose that a specific region of UpsA forms a binding site to bind species-  
88 specific *N*-glycan chains of S-layer components, thereby allowing species-specific cell  
89 aggregation and subsequent DNA exchange.

90

91

## 92 **Results**

### 93 **The role of pilin subunits in species-specificity**

94 To study the role of the Ups-pilin subunits (UpsA and UpsB) in species-specific recognition  
95 of *Sulfolobus* cells, a *S. acidocaldarius* strain was constructed in which the genomic region  
96 from the start codon of *upsA* until the stop codon of *upsB* was exchanged with the  
97 orthologous region from *S. tokodaii* (resulting in strain MW135; Figure 1A, Table 1). Upon  
98 UV-induction *S. acidocaldarius* MW135 was still found to produce Ups-pili (Figure S3),  
99 however, interestingly, it showed little to no cellular aggregation (Figure 1B). In order to test  
100 if this *S. acidocaldarius* Ups-hybrid strain was able to recognize and therefore aggregate with  
101 *S. tokodaii* cells, fluorescence in situ hybridisation (FISH) with species-specific probes was  
102 performed on mixed *S. acidocaldarius*/*S. tokodaii* strains after UV-induction. A positive  
103 control with a mixture of background strain *S. acidocaldarius* MW501 ( $\Delta flaI/\Delta aapF$ , a strain  
104 that does not produce archaella or Aap-pili; Table 1) and *S. tokodaii*, confirmed previously  
105 observed species-specific aggregation (Figure 1C, first panel). The negative control in which  
106 a *S. acidocaldarius*  $\Delta upsAB$  strain was mixed with *S. tokodaii*, revealed, as expected, no  
107 aggregation of the *S. acidocaldarius*  $\Delta upsAB$  strain and normal aggregation of *S. tokodaii*  
108 (Figure 1C, second panel). Interestingly, cells from *S. acidocaldarius* MW135 interacted with  
109 *S. tokodaii* cells and thereby formed mixed species aggregates (Figure 1C, third panel).

110 To find putative species-specific regions in the pilin subunits involved in species-  
111 specific recognition, alignments were made using UpsA and UpsB amino acid sequences,  
112 from several Sulfolobales (Figure S1). Additionally, the relationship between UpsA and  
113 UpsB homologs was studied by creating a phylogenetic tree (Figure S2, Supplementary  
114 results and methods). A region with low conservation was revealed in UpsA (Figure S1,  
115 amino acid 84-98 for *S. acidocaldarius*, red box). To test whether this region plays a role in

116 cell-cell recognition, a strain was constructed in which only the region of low conservation in  
117 *S. acidocaldarius* UpsA (amino acid 84-98) was exchanged with the corresponding part from  
118 *S. tokodaii* UpsA (amino acid 80-101) (MW137 Figure 1A, Table 1). Similar to what was  
119 observed for the *S. acidocaldarius* mutant in which *upsA* and *upsB* were exchanged  
120 completely (MW135), *S. acidocaldarius* MW137 showed pili formation (Figure S3) but  
121 showed little to no aggregation with itself (Figure 1B). Instead, it was found to aggregate  
122 with *S. tokodaii* (Figure 1C, fourth panel). This observation strongly suggests that the non-  
123 conserved region (exchanged in MW137) defines the species-specificity during cellular  
124 aggregation.

### 125 **The role of glycosylation in species-specificity**

126 The fact that *Sulfolobus* Ups wild-type strains are able to form mating pairs with Ups-deletion  
127 strains (32), suggests that factors, other than Ups-pili, play a role in species-specific  
128 recognition. The surface proteins of Sulfolobales are heavily glycosylated (36, 37). We  
129 therefore suggested that Ups-pili might recognize glycosylated proteins and thereby initiate  
130 cellular interactions. To confirm this hypothesis, UV induced aggregation assays were  
131 performed in the presence of monosaccharides that are also part of the *S. acidocaldarius* *N*-  
132 glycan chain (Glc<sub>1</sub>Man<sub>2</sub>GlcNAc<sub>2</sub>QuiS, containing glucose, mannose, *N*-acetylglucosamine  
133 and the *Sulfolobus*-specific sulfoquinovose residues) (37) (Figure 2). The addition of *N*-  
134 acetylglucosamine or glucose did not result in altered cellular aggregation (Figure 2A and B);  
135 however, in the presence of mannose, cell aggregates were significantly smaller (Figure 2B).  
136 This suggests that the mannose molecules partially saturate the binding sites of the Ups-pili  
137 and thereby inhibit interactions between pili and the glycan chains on the S-layer of the host  
138 cell resulting in reduced aggregation.

### 139 **Defining the glycosylation pattern of *S. tokodaii* S-layer proteins**

140 Our hypothesis that S-layer glycosylation is important for species-specificity suggests that  
141 different *Sulfolobus* species have different glycosylation patterns. So far, the glycan structure  
142 of *S. tokodaii* is unknown. To analyze the glycan structures on the S-layer of *S. tokodaii*, *N*-  
143 glycans were released from isolated S-layer by hydrazinolysis. Using MALDI/TOF-MS  
144 profiling, one main *N*-glycan species and two other low abundant species could be identified  
145 in both positive (Figure S4A) and negative ion mode (Figure S4B). The structures of *N*-  
146 glycans were proposed based on mass-to-charge ratio of each *N*-glycan ions observed (Figure  
147 S4, Table 2) as well as its MS/MS fragmentation pattern (Figure 3). The three *N*-glycan  
148 species could be identified as QuiS<sub>1</sub>Hex<sub>4</sub>HexNAc<sub>2</sub>, QuiS<sub>1</sub>Hex<sub>3</sub>HexNAc<sub>2</sub>, and  
149 QuiS<sub>1</sub>Hex<sub>4</sub>HexNAc<sub>1</sub>, respectively (Table 2). To determine the linkages between the sugars in  
150 the deduced *N*-glycan species, linkage analysis (38) was performed on the permethylated *N*-  
151 glycans released from S-layer proteins. The various types of linkages observed on each  
152 monosaccharide and their relative abundances on the *N*-glycans are shown in the Figure S5.  
153 The most plausible position of this linkage in the glycan chain can be observed on the right-  
154 side column in Figure S5. Based on this linkage information, MS<sup>n</sup> determination of glycan  
155 branching (Figure 3), and the glycan masses (Figure S4), the *N*-glycan glycoforms and their  
156 isomers were deduced (Figure S6). Figure 4 schematically shows the most prominent glycan  
157 structures from *S. acidocaldarius* (37), *S. solfataricus* (39) and *S. tokodaii* (this study). In  
158 agreement with our hypothesis, the core of these structures are similar, whereas the outer  
159 saccharides differ. A typical sulfated glycan is present in all three *Sulfolobus* glycan  
160 structures. Using LC-MS profiling on the tryptic digest of SlaA and SlaB, several different  
161 glycopeptides could indeed be observed (Supplementary results and methods, Figure S7 and  
162 Figure S8 respectively).

### 163 **Determination of the binding site in UpsA**



164 We know that a *S. acidocaldarius* mutant in which both Ups-pilin subunits are deleted,  
165 does not aggregate upon UV-stress (31). Here we could successfully complement this  
166 phenotype by expressing the *upsAB* genes from a maltose inducible plasmid (Figure 5,  
167  $\Delta upsAB + upsAB$ ). Using site directed-mutagenesis on this plasmid, we moreover created  
168 point mutations within the above-described region of interest of UpsA (black squares in  
169 Figure S1): D85A, N87A, N94A and Y96A. All mutants still produced pili upon UV  
170 induction (Figure S8). Interestingly, when expressing UpsA in which the poorly conserved  
171 residues D85 or Y96 were mutated to alanine, respectively, UV induced aggregation was  
172 significantly reduced. On the other hand, mutation of the conserved N87 or N94 showed  
173 wild-type aggregation (Figure 5). These results suggest that the region of low conservation  
174 within UpsA is specifically adapted to the glycan structure of the same species in order to  
175 ensure species-specific aggregation only.

## 176 **Discussion**

177 Both bacterial and archaeal T4P have shown to be essential for surface-adherence. Given the  
178 fact that bacterial T4P are strongly related to pathogenicity, their mode of binding has  
179 primarily been studied for pathogenic bacteria such as *P. aeruginosa*, *Vibrio cholerae*,  
180 *Myxococcus*, *Neisseria* and Enteropathogenic *E. coli* species. However, also non-pathogenic  
181 bacteria and archaea encode several T4P involved in adhesion, which are studied in far less  
182 detail. The Crenarchaeal Sulfolobales encode three types of T4P: archaella, involved in  
183 swimming motility (20); Aap-pili, involved in attachment to diverse surfaces (24, 25); and  
184 Ups-pili, mediating intraspecies cellular aggregation and DNA exchange (29, 31, 32, 35).  
185 During this study, we have examined the role that Ups-pili play in the formation of  
186 *Sulfolobus* mating partners. In particular, we focused on the role that pilin subunit UpsA  
187 plays in cell-recognition.

188           The Ups-pilus is formed by two pilin subunits UpsA and UpsB, which are both thought  
189   to be major pilin subunits that build up mixed pili structures (31). We revealed that UpsA is  
190   involved in species-specific cellular interactions and we were able to alter this specificity by  
191   exchanging (parts of) the pilin subunit with that of another species (Figure 1). The binding of  
192   bacterial T4P to other cells is often based on pilin-sugar interactions. Surface exposed  
193   glycans can be found on cells from all domains of life where they display an enormous range  
194   of different structures that are often highly specific to certain species (40). Glycans are  
195   therefore perfect anchors to bind specific host- or partner cells. In *Saccharomyces cerevisiae*,  
196   surface exposed lectins can bind to surface exposed sugars in a calcium-dependent manner,  
197   thereby forming cellular aggregates, a process which is called flocculation (41). This  
198   behavior can be inhibited by saturating the binding of the lectins through addition of loose  
199   sugars to the medium (42) (Figure 2). In similar experiments with *S. acidocaldarius* we found  
200   that mannose has an inhibiting effect on UV-induced cellular aggregation. Since two outer  
201   mannose residues are present in the *S. acidocaldarius* *N*-glycan tree, binding of Ups-pili to  
202   this side of the glycans tree is probable. When analyzing the *N*-glycans of *S. tokodaii*, we  
203   could indeed find differences in this part of the *N*-glycan structure when compared to that of  
204   *S. acidocaldarius* (37) and *S. solfataricus*. (39) (Figure 4). As observed for Eukarya (43), the  
205   core or the glycan structure is similar in all three species, whereas the outer residues differ.  
206   Our results thereby suggest that UpsA contains a specific binding pocket that is able to bind  
207   specific sugar moieties of the *N*-glycans presented on the S-layer of distinct *Sulfolobus*  
208   species (Figure 6).

209           Among the euryarchaeal *Haloferox* species, glycosylation was found to be essential for  
210   cell fusion (44), emphasizing the importance of glycosylation in Archaeal cellular recognition  
211   in general. It is unclear if pili or other types of lectin molecules are involved in cellular

212 interactions that initiate *Haloferax* fusion events. Similar to our findings, different *Haloferax*  
213 species are also known to be differentially glycosylated (45) leading to semi-specific cell-cell  
214 recognition (44). Cell fusion between different *Haloferax* species could also be observed but  
215 with far lower efficiency (46). In addition, under different environmental conditions,  
216 *Haloferax* glycosylation patterns change, leading to more or less favorable *N*-glycans for  
217 mating (47). One could envision that low frequency interactions between different *Sulfolobus*  
218 species also occur and might occasionally lead to horizontal gene transfer (34), thereby  
219 affecting speciation. In a single hot spring in Kamchatka (Russia) two different groups of  
220 *Sulfolobus islandicus* strains were found to be present. Despite their coexistence, it was  
221 postulated that *S. islandicus* species mainly exchange DNA within these groups (48). It is  
222 likely that *N*-glycan patterns and Ups-pili between the species are different serving as a  
223 barrier to gene transfer. This behavior might be seen as the two groups diverging into  
224 different species.

225         The Ced-system that is involved in DNA transfer among Sulfolobales can also be found  
226 in several crenarchaea that do not encode Ups-pili (34, 35), it is therefore likely these species  
227 have developed a different mechanism to initiate cellular interactions. Given the importance  
228 of glycosylation in cell-cell interactions in both euryarchaeal *Haloferax* and crenarchaeal  
229 *Sulfolobus* species, glycosylation most likely also plays a role in these interactions.

230         This study has given molecular insights in the cellular recognition mechanism of the  
231 previously described crenarchaeal Ups-system (29, 31, 32). Our current model suggests that  
232 upon DNA damage, Ups-pili are formed; the UpsA pilin subunits contain a species-specific  
233 glycan binding pocket in pilin subunit UpsA that can only bind glycans presented on cells  
234 from the same species (Figure 6). This system allows the formation of species-specific  
235 cellular connections prior to DNA-exchange via the Ced-system (35). In that way, only DNA

236 from the same species is exchanged and used for DNA repair via efficient homologous  
237 recombination. This proposed cellular recognition mechanism in Sulfolobales restricts  
238 exchange of genomic DNA to cells from the same species, thereby playing an important in  
239 role genome integrity and the maintenance of species. Co-evolution of *N*-glycosylation and  
240 pilin subunit UpsA might play an important role in speciation.

## 241 **Experimental procedures**

### 242 **Culture conditions.**

243 *Sulfolobus acidocaldarius* strains and derived mutants (Table 2) were grown aerobically at  
244 75 °C in basic Brock medium (49), supplemented with 0.1% NZ amine, 0.2% dextrin and 20  
245 µg/ml uracil and adjusted to pH 3.5 with sulfuric acid. For solid media the medium was  
246 supplemented with 1.5% gelrite. Plates were incubated for 5-6 days at 76°C. *E. coli*  
247 competent cells DH5α and ER1821 (NEB) used for respectively cloning and methylation of  
248 plasmid DNA were grown in LB medium (10 g/l tryptone; 5 g/l yeast extract; 10 g/l NaCl) at  
249 37°C supplemented with the appropriate antibiotics. Growth of cells was monitored by optical  
250 density measurements at 600 nm.

### 251 **Deleting, exchanging and complementation of genes in *S. acidocaldarius*.**

252 To construct deletion and pilin exchange mutants; up- and downstream flanking regions of  
253 the genes of interest (approximately 600 bp) were amplified with primers listed in Table S1.  
254 Overlap PCR was performed to connect the up- and downstream fragments. To replace (parts  
255 of) *upsA* and *upsB* from *S. acidocaldarius* with their homologues from *Sulfolobus tokodaii*,  
256 synthetic DNA was ordered (GenScript) consisting out of *S. acidocaldarius upsAB* flanking  
257 regions and (parts of) *S. tokodaii upsAB* genes (Table S1). The PCR product and synthetic  
258 DNA fragments were subsequently cloned into pSVA406, resulting in the plasmids listed in  
259 Table 1. The plasmids were methylated in *E. coli* ER1821 containing pM.EsaBC4I (NEB)

260 (50) and transformed into *S. acidocaldarius* MW501 ( $\Delta fla/\Delta aap$ ) (Table 1) (51). This  
261 background strain lacks Aap-pili and archaella, allowing easy EM analysis. Integrants were  
262 selected on plates lacking uracil and grown in 24-well plates for 2 days in the same medium.  
263 Subsequently cultures were plated and grown for 5 days on second selection plates containing  
264 uracil and 100  $\mu\text{g/ml}$  5-FOA to select for clones in which the plasmid looped out by  
265 homologous recombination. Obtained colonies were tested by PCR for successful  
266 deletion/replacement of the genes. Correctness of strains was confirmed by DNA sequencing.  
267 Strains that were made during this study are listed in Table 1.

268 For complementation of a  $\Delta upsAB$  mutant (MW143), the DNA region comprising *upsA*  
269 and *B* was amplified using primers listed in Table S1 and cloned into pSVA1450 under  
270 control of a maltose inducible promoter resulting in plasmid pSVA1855 (Table S1). This  
271 plasmid was subsequently used to as a template to introduce point mutations into *upsA*  
272 (D85A, N87A, N94A and Y96A) (Table 1) using two overlapping primers per mutation  
273 (Table S1). Resulting plasmids were then transformed via electroporation into MW143 as  
274 described previously (51). Cultures were grown without the addition of uracil. Expression of  
275 (mutated) UpsA and B was induced by addition of 0.2% maltose.

#### 276 **UV treatment, aggregation assays.**

277 UV light treatment was performed as described in (29); 10 ml culture ( $\text{OD}_{600}$  0.2-0.3) was  
278 treated with a UV dose of  $75 \text{ J/m}^2$  (254 nm, Spectroline, UV crosslinker) in a plastic petri  
279 dish. For FISH experiments *S. acidocaldarius* and *S. tokodaii* were first mixed in equal  
280 amounts. For complementation the  $\Delta upsAB$  strain, expression of UpsAB (derivatives) was  
281 additionally induced with 0.2% maltose. Afterwards cultures were put back at  $76^\circ\text{C}$  for 3 h.  
282 Samples taken at different time points were analyzed with phase contrast microscopy. To  
283 quantify aggregated cells after induction with UV, 5  $\mu\text{l}$  of cell culture (diluted to OD 0.2) was

284 spotted on a microscope slide covered with a thin layer of 2% agarose in Brock minimal  
285 medium. Cells were visualized with phase contrast microscopy (Zeiss, Axio Observer.Z1).  
286 Free and aggregated cells ( $\geq 3$ ) were counted for at least three fields per strain using ImageJ  
287 cell counter. Percentages of cells in aggregates were subsequently calculated.

### 288 **Fluorescence *in situ* hybridization (FISH).**

289 For FISH experiments, 10  $\mu$ l of a mixed UV induced (described above) culture was spotted  
290 and dried on a glass slide. To fix the cells, 10  $\mu$ l of 37% formaldehyde was spotted on top of  
291 the cells and incubated for 20 min at room temperature. Afterwards formaldehyde was  
292 removed and the cells were washed for 10 min with a drop of 1x PBS . Glass slides were  
293 subsequently dried at room temperature. Cells were permeabilized by incubating the slides 3  
294 min in 50, 80 and 96% ethanol, respectively. After drying the slides, 10  $\mu$ l of hybridization  
295 buffer (900 mM NaCl, 20mM Tris HCl pH 8.0, 10% formamid) mixed with 50 ng/ $\mu$ l FISH  
296 probes (for *S. acidocaldarius* and *S. tokodaii*, Table S1) was spotted on the cells. Slides were  
297 incubated in the dark at 46 °C for 1.5 h for hybridization. Subsequently the cells were  
298 washed by incubating the slides for 10 min in wash buffer (450 mM NaCl, 20 mM Tris HCl  
299 pH 8.0) at 48°C. Slides were then dipped in ice cold water and dried. For microscopy, 1x  
300 PBS was spotted on the cells and a coverslip was added. Cells were examined using  
301 fluorescence microscopy (Zeiss, Axio Observer.Z1).

### 302 **S-layer isolation**

303 A cell pellet from a 50 ml *S. tokodaii* str. 7 culture with an OD<sub>600</sub> of about 0.6 was  
304 resuspended and incubated whilst shaking (500 rpm) for 60 min at 37°C in 30 ml of buffer  
305 (10 mM NaCl, 20 mM MgSO<sub>4</sub>, 0.5% sodium lauroylsarcosine, pH 5.5). Samples were  
306 centrifuged for 45 min in an Avanti J-26 XP centrifuge (Beckman Coulter) at 21,000 g (rotor  
307 JA-25.50), yielding a brownish tan pellet. The pellet was resuspended and incubated for 30

308 min at 37°C in 1 ml of buffer A. Subsequent centrifugation for 20 min (tabletop centrifuge at  
309 maximum speed), yielded in a translucent tan pellet containing S-layer proteins. Purified S-  
310 layer proteins were washed a few times with water and then stored in water at 4°C.

### 311 **Electron microscopy analysis**

312 Ups-pili on *S. acidocaldarius* cells were visualized with TEM. Cells were negatively stained  
313 with 2% uranyl acetate on carbon-coated copper grids. Transmission electron microscopy  
314 images were recorded using the Talos L120C (Thermo Scientific™) microscope equipped  
315 with a 4k × 4k Ceta CMOS camera. Acceleration voltage was set to 120kV and magnification  
316 to 2.27Å/ pixel.

### 317 **Acknowledgements**

318 AS, IMD and PA were supported in part by the National Institutes of Health grants  
319 1S10OD018530 and P41GM10349010 to the Complex Carbohydrate Research Center. SB  
320 was supported by a postdoctoral fellowship from the German Academy of Sciences  
321 Leopoldina. We thank Małgorzata Ajon (University of Groningen) for technical support.



## 322 References

- 323 1. Craig L, Forest KT, Maier B. 2019. Type IV pili: dynamics, biophysics and functional  
324 consequences. *Nat Rev Microbiol*.
- 325 2. Giltner CL, Nguyen Y, Burrows LL. 2012. Type IV pilin proteins: versatile molecular  
326 modules. *Microbiol Mol Biol Rev* 76:740–772.
- 327 3. Maier B, Wong GCL. 2015. How Bacteria Use Type IV Pili Machinery on Surfaces.  
328 *Trends Microbiol* 23:775–788.
- 329 4. Denise R, Abby SS, Rocha EP. 2019. Diversification of the type IV filament super-  
330 family into machines for adhesion, secretion, DNA transformation and motility.  
331 bioRxiv 576694.
- 332 5. Coureuil M, Join-Lambert O, Lécuyer H, Bourdoulous S, Marullo S, Nassif X. 2012.  
333 Mechanism of meningeal invasion by *Neisseria meningitidis*. *Virulence* 3:164–172.
- 334 6. Bernard SC, Simpson N, Join-Lambert O, Federici C, Laran-Chich M-P, Maïssa N,  
335 Bouzinba-Ségar H, Morand PC, Chretien F, Taouji S, Chevet E, Janel S, Lafont F,  
336 Coureuil M, Segura A, Niedergang F, Marullo S, Couraud P-O, Nassif X, Bourdoulous  
337 S. 2014. Pathogenic *Neisseria meningitidis* utilizes CD147 for vascular colonization.  
338 *Nat Med* 20:725–731.
- 339 7. Kolappan S, Coureuil M, Yu X, Nassif X, Egelman EH, Craig L. 2016. Structure of the  
340 *Neisseria meningitidis* Type IV pilus. *Nat Commun* 7:13015.
- 341 8. Hung M-C, Christodoulides M. 2013. The biology of *Neisseria* adhesins. *Biology*  
342 (Basel) 2:1054–109.
- 343 9. Scheuierpflug I, Rudel T, Ryll R, Pandit J, Meyer TF. 1999. Roles of PilC and PilE  
344 proteins in pilus-mediated adherence of *Neisseria gonorrhoeae* and *Neisseria*  
345 *meningitidis* to human erythrocytes and endothelial and epithelial cells. *Infect Immun*  
346 67:834–843.
- 347 10. Winther-Larsen HC, Hegge FT, Wolfgang M, Hayes SF, van Putten JP, Koomey M.  
348 2001. *Neisseria gonorrhoeae* PilV, a type IV pilus-associated protein essential to  
349 human epithelial cell adherence. *Proc Natl Acad Sci U S A* 98:15276–15281.
- 350 11. Hu W, Yang Z, Lux R, Zhao M, Wang J, He X, Shi W. 2012. Direct visualization of  
351 the interaction between pilin and exopolysaccharides of *Myxococcus xanthus* with  
352 eGFP-fused PilA protein. *FEMS Microbiol Lett* 326:23–30.
- 353 12. Li Y, Sun H, Ma X, Lu A, Lux R, Zusman D, Shi W. 2003. Extracellular  
354 polysaccharides mediate pilus retraction during social motility of *Myxococcus xanthus*.  
355 *Proc Natl Acad Sci U S A* 100:5443–5448.
- 356 13. Carter MQ, Chen J, Lory S. 2010. The *Pseudomonas aeruginosa* pathogenicity island  
357 PAPI-1 is transferred via a novel type IV pilus. *J Bacteriol* 2010/04/07. 192:3249–  
358 3258.
- 359 14. Hong TP, Carter MQ, Struffi P, Casonato S, Hao Y, Lam JS, Lory S, Jousson O. 2017.  
360 Conjugative type IVb pilus recognizes lipopolysaccharide of recipient cells to initiate  
361 PAPI-1 pathogenicity island transfer in *Pseudomonas aeruginosa*. *BMC Microbiol*  
362 17:31.
- 363 15. Albers S V, Pohlschroder M. 2009. Diversity of archaeal type IV pilin-like structures.



- 364 Extremophiles 2009/04/07. 13:403–410.
- 365 16. Ng SY, Zolghadr B, Driessen AJ, Albers S V, Jarrell KF. 2008. Cell surface structures  
366 of archaea. J Bacteriol 2008/07/16. 190:6039–6047.
- 367 17. Szabo Z, Stahl AO, Albers S V, Kissinger JC, Driessen AJ, Pohlschroder M. 2007.  
368 Identification of diverse archaeal proteins with class III signal peptides cleaved by  
369 distinct archaeal prepilin peptidases. J Bacteriol 2006/11/23. 189:772–778.
- 370 18. Makarova KS, Koonin E V, Albers S-V. 2016. Diversity and Evolution of Type IV pili  
371 Systems in Archaea. Front Microbiol 7:667.
- 372 19. Chaudhury P, Quax TEF, Albers S-V. 2018. Versatile cell surface structures of archaea.  
373 Mol Microbiol 107:298–311.
- 374 20. Jarrell KF, Albers S-V. 2012. The archaellum: an old motility structure with a new  
375 name. Trends Microbiol 20:307–312.
- 376 21. Albers S-V, Jarrell KF. 2018. The Archaellum: An Update on the Unique Archaeal  
377 Motility Structure. Trends Microbiol 26:351–362.
- 378 22. Tripepi M, Imam S, Pohlschröder M. 2010. Haloferax volcanii flagella are required for  
379 motility but are not involved in PibD-dependent surface adhesion. J Bacteriol  
380 192:3093–102.
- 381 23. Esquivel R, Xu R, Pohlschroder M. 2013. Novel, archaeal adhesion pilins with a  
382 conserved N-terminus. J Bacteriol.
- 383 24. Henche A-L, Ghosh A, Yu X, Jeske T, Egelman E, Albers S-V. 2012. Structure and  
384 function of the adhesive type IV pilus of *Sulfolobus acidocaldarius*. Env Microbiol  
385 14:3188–3202.
- 386 25. Zolghadr B, Klingl A, Koerdts A, Driessen AJ, Rachel R, Albers S V. 2010. Appendage-  
387 mediated surface adherence of *Sulfolobus solfataricus*. J Bacteriol 2009/10/27.  
388 192:104–110.
- 389 26. Bardy SL, Eichler J, Jarrell KF. 2003. Archaeal signal peptides--a comparative survey  
390 at the genome level. Protein Sci 2003/08/22. 12:1833–1843.
- 391 27. Jarrell KF, Stark M, Nair DB, Chong JPJJ. 2011. Flagella and pili are both necessary  
392 for efficient attachment of *Methanococcus maripaludis* to surfaces. FEMS Microbiol  
393 Lett 319:44–50.
- 394 28. Fröls S, Gordon PMK, Panlilio MA, Duggin IG, Bell SD, Sensen CW, Schleper C.  
395 2007. Response of the hyperthermophilic archaeon *Sulfolobus solfataricus* to UV  
396 damage. J Bacteriol 2007/10/02. 189:8708–8718.
- 397 29. Fröls S, Ajon M, Wagner M, Teichmann D, Zolghadr B, Folea M, Boekema EJ,  
398 Driessen AJ, Schleper C, Albers S V. 2008. UV-inducible cellular aggregation of the  
399 hyperthermophilic archaeon *Sulfolobus solfataricus* is mediated by pili formation. Mol  
400 Microbiol 2008/11/08. 70:938–952.
- 401 30. Götz D, Paytubi S, Munro S, Lundgren M, Bernander R, White MF. 2007. Responses  
402 of hyperthermophilic crenarchaea to UV irradiation. Genome Biol 8:R220.
- 403 31. van Wolferen M, Ajon M, Driessen AJM, Albers S-V. 2013. Molecular analysis of the  
404 UV-inducible pili operon from *Sulfolobus acidocaldarius*. Microbiologyopen 2:928–  
405 937.

- 406 32. Ajon M, Fröls S, van Wolferen M, Stoecker K, Teichmann D, Driessen AJ, Grogan  
407 DW, Albers S V, Schleper C. 2011. UV-inducible DNA exchange in  
408 hyperthermophilic archaea mediated by type IV pili. *Mol Microbiol* 2011/10/18.  
409 82:807–817.
- 410 33. Allers T. 2011. Swapping genes to survive - a new role for archaeal type IV pili. *Mol*  
411 *Microbiol* 82:789–791.
- 412 34. Wagner A, Whitaker RJ, Krause DJ, Heilers J-H, Van Wolferen M, Van Der Does C,  
413 Albers S-V. 2017. Mechanisms of gene flow in archaea. *Nat Rev Microbiol* 15.
- 414 35. van Wolferen M, Wagner A, van der Does C, Albers S-V. 2016. The archaeal Ced  
415 system imports DNA. *Proc Natl Acad Sci U S A* 113:2496–2501.
- 416 36. Albers S-V, Meyer BH. 2011. The archaeal cell envelope. *Nat Rev Microbiol* 9:414–  
417 426.
- 418 37. Peyfoon E, Meyer B, Hitchen PG, Panico M, Morris HR, Haslam SM, Albers S V, Dell  
419 A. 2010. The S-layer glycoprotein of the crenarchaeote *Sulfolobus acidocaldarius* is  
420 glycosylated at multiple sites with chitobiose-linked N-glycans. *Archaea* 2010/10/12.  
421 2010.
- 422 38. Shajahan A, Heiss C, Ishihara M, Azadi P. 2017. Glycomic and glycoproteomic  
423 analysis of glycoproteins—a tutorial. *Anal Bioanal Chem* 409:4483–4505.
- 424 39. Palmieri G, Balestrieri M, Peter-Katalinić J, Pohlentz G, Rossi M, Fiume I, Pocsfalvi  
425 G. 2013. Surface-exposed glycoproteins of hyperthermophilic *Sulfolobus solfataricus*  
426 P2 Show a common N-glycosylation profile. *J Prot Res* 12:2779–2790.
- 427 40. National research council. 2012. Transforming glycoscience: a roadmap for the future.  
428 National Academies Press (US).
- 429 41. Soares E V. 2011. Flocculation in *Saccharomyces cerevisiae*: a review. *J Appl*  
430 *Microbiol* 110:1–18.
- 431 42. Masy CL, Henquinet A, Mestdagh MM. 1992. Flocculation of *Saccharomyces*  
432 *cerevisiae*: inhibition by sugars. *Canad J Microbiol* 38:1298–306.
- 433 43. Varki A, Lowe JB. 2009. Biological Roles of GlycansEssentials of Glycobiology.
- 434 44. Shalev Y, Turgeman-Grott I, Tamir A, Eichler J, Gophna U. 2017. Cell Surface  
435 Glycosylation Is Required for Efficient Mating of *Haloferax volcanii*. *Front Microbiol*  
436 8:1253.
- 437 45. Kaminski L, Naparstek S, Kandiba L, Cohen-Rosenzweig C, Arbiv A, Konrad Z,  
438 Eichler J. 2013. Add salt, add sugar: N-glycosylation in *Haloferax volcanii* : Figure 1.  
439 *Biochem Soc Trans* 41:432–435.
- 440 46. Naor A, Lapierre P, Mevarech M, Papke RT, Gophna U. 2012. Low Species Barriers in  
441 Halophilic Archaea and the Formation of Recombinant Hybrids. *Curr Biol* 22:1444–  
442 1448.
- 443 47. Guan Z, Naparstek S, Calo D, Eichler J. 2012. Protein glycosylation as an adaptive  
444 response in Archaea: growth at different salt concentrations leads to alterations in  
445 *Haloferax volcanii* S-layer glycoprotein N-glycosylation. *Environ Microbiol* 14:743–  
446 753.
- 447 48. Cadillo-Quiroz H, Didelot X, Held NL, Herrera A, Darling A, Reno ML, Krause DJ,

- 448 Whitaker RJ. 2012. Patterns of Gene Flow Define Species of Thermophilic Archaea.  
449 PLoS Biol 10:e1001265.
- 450 49. Brock TD, Brock KM, Belly RT, Weiss RL. 1972. *Sulfolobus*: a new genus of sulfur-  
451 oxidizing bacteria living at low pH and high temperature. Arch Mikrobiol 1972/01/01.  
452 84:54–68.
- 453 50. Kurosawa N, Grogan DW. 2005. Homologous recombination of exogenous DNA with  
454 the *Sulfolobus acidocaldarius* genome: properties and uses. FEMS Microbiol Lett  
455 253:141–149.
- 456 51. Wagner M, van Wolferen M, Wagner A, Lassak K, Meyer BH, Reimann J, Albers S-V.  
457 2012. Versatile Genetic Tool Box for the Crenarchaeote *Sulfolobus acidocaldarius*.  
458 Front Microbiol 3:214.
- 459 52. Suzuki T, Iwasaki T, Uzawa T, Hara K, Nemoto N, Kon T, Ueki T, Yamagishi A,  
460 Oshima T. 2002. *Sulfolobus tokodaii* sp. nov. (f. *Sulfolobus* sp. strain 7), a new  
461 member of the genus *Sulfolobus* isolated from Beppu Hot Springs, Japan.  
462 Extremophiles 6:39–44.
- 463 53. van Wolferen M, Ajon M, Driessen AJM, Albers S-V. 2013. Molecular analysis of the  
464 UV-inducible pili operon from *Sulfolobus acidocaldarius*. Microbiologyopen 2:928–  
465 37.
- 466 54. Meyer BH, Zolghadr B, Peyfoon E, Pabst M, Panico M, Morris HR, Haslam SM,  
467 Messner P, Schaffer C, Dell A, Albers S V. 2011. Sulfoquinovose synthase - an  
468 important enzyme in the N-glycosylation pathway of *Sulfolobus acidocaldarius*. Mol  
469 Microbiol 2011/11/09. 82:1150–1163.
- 470
- 471

472 **Figure legends**

473 **Figure 1:** *S. acidocaldarius upsAB* mutants and their aggregation behavior. (A) (Parts of)  
474 *upsA* and *B* from *S. acidocaldarius* or MW501 ( $\Delta$ *flaI*/  $\Delta$ *aaopF*) (green) were replaced with the  
475 same regions from *S. tokodaii* (red), resulting in MW135 (exchange from start codon of *upsA*  
476 until stop codon of *upsB*) and MW137 (*Saci upsA* aa 84-98::*ST upsA* aa 80-101) (see also  
477 Figure S1). (B) Quantitative analysis of UV-induced cellular aggregation of mutants shown  
478 in A. Percentage of cells in aggregates 3h after induction with or without 75 J/m<sup>2</sup> UV (dark or  
479 light grey, respectively). (C) Aggregation behavior of mixtures of *S. tokodaii* (red) with  
480 different *S. acidocaldarius* mutants (green) after treatment with UV-light (UV). Untreated  
481 cells were used as a control. Mutants used for this experiment were: MW501 (wt *upsAB*),  
482 MW143 ( $\Delta$ *upsAB*), MW135 and MW137. FISH labeled cells were visualized with  
483 fluorescence microscopy. Scale bar 10  $\mu$ m.

484 **Figure 2:** UV-induced aggregation of *S. acidocaldarius* MW001 upon addition of 20 mM  
485 mannose, glucose or *N*-acetylglucosamine. (A) Percentage of cells in aggregates. (B) Average  
486 sizes of formed aggregates. Light grey bars represent non-induced cells and dark grey bars  
487 represent cells induced with 75 J/m<sup>2</sup> UV.

488 **Figure 3:** HCD MS<sup>2</sup> spectra of heptasaccharide (m/z - 1651.7, Figure S4a) released from the  
489 S-layer proteins from *S. tokodaii* by hydrazinolysis.

490 **Figure 4:** Structure of the glycan trees present on the S-layer of *S. tokodaii* in comparison to  
491 those from *S. acidocaldarius* (37) and *S. solfataricus* (39).

492 **Figure 5:** UV induced cellular aggregation of *S. acidocaldarius*  $\Delta$ *upsAB* complementation  
493 strains. A *S. acidocaldarius*  $\Delta$ *upsAB* mutant (MW143) was complemented with maltose  
494 inducible plasmids carrying *upsAB* or *upsAB* with a D85A, N87, N94A or Y96A mutation in

495 UpsA (see also Figure S1). Percentage of cells in aggregates 3h after induction with or  
496 without 75 J/m<sup>2</sup> UV (dark or light grey, respectively).

497 **Figure 6:** Proposed model species-specific interactions between Ups-pili and N-glycosylated  
498 S-layer of Sulfolobales. Ups-pili of *S. acidocaldarius* (green) only form interactions with the  
499 N-glycan of the same species and not with that of other species *S. tokodaii* (red).

500

501 **Table 1:** Strains used during this study

| Strain               | Background strain        | Genotype                                          | Source/ reference  |
|----------------------|--------------------------|---------------------------------------------------|--------------------|
| <i>S. tokodaii</i> 7 |                          |                                                   | Suzuki et al. 2002 |
|                      | <i>S. acidocaldarius</i> |                                                   |                    |
| MW001                | DSM639                   | $\Delta$ pyrEF (91–412 bp)                        | Wagner et al. 2012 |
|                      | <i>S. acidocaldarius</i> | <i>Saci upsAB::ST upsAB</i> ,                     |                    |
| MW135                | MW501                    | $\Delta$ flaI ( $\Delta$ bp 1-672), $\Delta$ aapF | This study         |
|                      | <i>S. acidocaldarius</i> | <i>Saci upsA</i> (aa 84-98):: <i>ST</i>           |                    |
| MW137                | MW501                    | <i>upsA</i> (aa 80-101), $\Delta$ flaI            |                    |
|                      |                          | ( $\Delta$ bp 1-672), $\Delta$ aapF               | This study         |
|                      | <i>S. acidocaldarius</i> | $\Delta$ upsAB, $\Delta$ flaI ( $\Delta$ bp 1-    |                    |
| MW143                | MW501                    | 672), $\Delta$ aapF                               | This study         |
|                      | <i>S. acidocaldarius</i> |                                                   |                    |
| MW501                | MW001                    | $\Delta$ flaI ( $\Delta$ bp 1-672), $\Delta$ aapF | (53)               |
|                      | <i>S. acidocaldarius</i> |                                                   |                    |
| $\Delta$ Agl3        | MW001                    | $\Delta$ agl3 ( $\Delta$ saci0423)                | Meyer et al. 2011  |

502

503

504 **Table 2.** List of *N*-linked glycans released from S-layer glycoprotein from *S. tokodaii*  
505 detected by MALDI/TOF- MS. Abbreviations: QuiS: sulfoquinovose, Hex: hexose, HexNAc  
506 *N*-acetyl hexosamine.

507 **Positive ion mode**

| Permethylated mass (m/z) <sup>1</sup> | Text description of structures                         | Percentage of glycans |
|---------------------------------------|--------------------------------------------------------|-----------------------|
| 1406                                  | QuiS <sub>1</sub> Hex <sub>4</sub> HexNAc <sub>1</sub> | 3.92                  |
| 1447                                  | QuiS <sub>1</sub> Hex <sub>3</sub> HexNAc <sub>2</sub> | 7.09                  |
| 1651                                  | QuiS <sub>1</sub> Hex <sub>4</sub> HexNAc <sub>2</sub> | 88.99                 |

<sup>1</sup>All masses (mass+ 2Na - H) are single-charged.

<sup>2</sup>Calculated from the area units of detected *N*-linked glycans.

508 **Negative ion mode**

| Permethylated mass (m/z) <sup>1</sup> | Text description of structures                         | Percentage of glycans |
|---------------------------------------|--------------------------------------------------------|-----------------------|
| 1360                                  | QuiS <sub>1</sub> Hex <sub>4</sub> HexNAc <sub>1</sub> | 1.27                  |
| 1401                                  | QuiS <sub>1</sub> Hex <sub>3</sub> HexNAc <sub>2</sub> | 1.82                  |
| 1605                                  | QuiS <sub>1</sub> Hex <sub>4</sub> HexNAc <sub>2</sub> | 96.91                 |

<sup>1</sup>All masses (mass - H) are single-charged.

<sup>2</sup>Calculated from the area units of detected *N*-linked glycans.

509

510 **Supplementary material:**

511 **Supplementary results and methods:** describing the phylogenetic analysis of UpsA and  
512 UpsB from different Sulfolobales and the *N*-glycan analysis of the glycosylated S-layer of *S.*  
513 *tokodaii* S-layer proteins SlaA and SlaB.

514 **Table S1:** Plasmids and primers used during this study.

515 **Figure S1:** Alignments of UpsA from different Sulfolobales. The class III cleavage site,  
516 cleaved by PibD is depicted by a red line. The red box in UpsA indicates the less conserved  
517 region. Shown are UpsA amino acid sequences from *Sulfolobus acidocaldarius* DSM 639  
518 (*Saci*), *Sulfolobus tokodaii* Str. 7 (*ST*), *Sulfolobus solfataricus* P2 (*Sso*), *Stygiolobus azoricus*  
519 (*Staz*), *Metallosphaera cuprina* Ar-4 (*Mcup*), *Metallosphaera hakonensis* DSM 7519 (*Mhak*),  
520 *Metallosphaera sedula* DSM5348 (*Msed*), and *Metallosphaera yellowstonensis* MK1 (*Myel*).

521 **Figure S2:** Maximum-likelihood phylogenetic tree of UpsA and UpsB homologs from  
522 different archaeal species (*Sulfolobus acidocaldarius* strains: DSM 639, N8, Ron12/I,  
523 SUSAZ; *Sulfolobus solfataricus* strains: P2, 98/2, P1; *Sulfolobus islandicus* strains: REY15A,  
524 HVE10/4, M.16.4; *Sulfolobus tokodaii* str. 7; *Stygiolobus azoricus*; *Metallosphaera sedula*  
525 DSM5348; *Metallosphaera cuprina* Ar-4; *Metallosphaera hakonensis* DSM 7519;  
526 *Metallosphaera yellowstonensis* MK1). Branch numbers represent bootstrap values above  
527 80% (100 replicates).

528 **Figure S3:** Transmission electron micrographs of UV induced *S. acidocaldarius* mutants  
529 (upper panel) and expression strains (lower panel). Upper panel: Ups-pili of *S. acidocaldarius*  
530 MW501 ( $\Delta flaI / \Delta aapF$ ), MW135 (exchange *S. acidocaldarius upsAB* genes with those of *S.*  
531 *tokodaii* from start codon of *upsA* until stop codon of *upsB*) and MW137 (*Saci upsA* aa 84-  
532 98::*ST upsA* aa 80-101). Lower panel: UV induced *S. acidocaldarius* expression strains.



533 Wildtype and mutated *upsAB* genes (black squares in Figure S1) were expressed in a  
534  $\Delta upsAB/\Delta flaI/\Delta aapF$  strain (MW143). The following maltose-inducible expression plasmids  
535 were used: pSVA1855 expressing wildtype *upsAB*; pSVA1860, expressing *upsAB* with a  
536 D85A mutation in *upsA*; pSVA1860, expressing *upsAB* with a D85A mutation in *upsA*.  
537 pSVA1861, expressing *upsAB* with a N87A mutation in *upsA*; pSVA1862, expressing *upsAB*  
538 with a N94A mutation in *upsA*; pSVA1863, expressing *upsAB* with a Y96A mutation in  
539 *upsA*. Scale bar 100 nm.

540 **Figure S4:** (A) MALDI MS spectra of *N*-glycans released from the S-layer protein from *S.*  
541 *tokodaii* by hydrazinolysis observed (positive ion mode). (B) MALDI MS spectra of *N*-  
542 glycans released from the S-layer protein from *S. tokodaii* by hydrazinolysis observed  
543 (negative ion mode). Structures are assigned based on MS/MS analysis. \*During  
544 hydrazinolysis a fraction of glycans gets derivatized by hydrazine reagent.

545 **Figure S5:** Glycosyl linkages of monosaccharides of *N*-glycans from the S-Layer proteins of  
546 *S. tokodaii* were determined by GC-MS analysis using the PMAA (Partially Methylated  
547 Alditol Acetate) method.

548 **Figure S6:** Different possible glycoforms of *N*-glycans identified on the S-layer proteins  
549 from *S. tokodaii*. Multiple isomers of each glycoforms were also observed. The structure,  
550 branching and linkage of *N*-glycans were characterized by MS<sup>n</sup> fragmentation by ESI-MS<sup>n</sup>  
551 and linkage analysis by GC-MS.

552 **Figure S7:** *N*-linked glycosylation sites identified from SlaA of *S. tokodaii* by LC-MS/MS  
553 analysis (Tryptic digestion and semi-specific cleavage search using Byonic software).

554 (A) HCD MS<sup>2</sup> spectra of glycopeptide <sup>1175</sup>IYYN[SuphoQuinovose<sub>1</sub>Hex<sub>4</sub>HexNAc<sub>2</sub>]  
555 ATSGR<sup>1183</sup> from SlaA. (B) HCD MS<sup>2</sup> spectra of glycopeptide

556 <sup>1188</sup>NVYGVVVLN[SuphoQuinovose<sub>1</sub>Hex<sub>4</sub>HexNAc<sub>2</sub>]AS GN<sup>1200</sup> from SlaA.

557 (C) HCD MS<sup>2</sup> spectra of glycopeptide

558 <sup>1222</sup>AVLPN[SuphoQuinovose<sub>1</sub>Hex<sub>4</sub>HexNAc<sub>2</sub>]NTLTTL TFNK<sup>1236</sup> from SlaA.

559 (D) HCD MS<sup>2</sup> spectra of glycopeptide

560 <sup>1298</sup>IIPAN[SuphoQuinovose<sub>1</sub>Hex<sub>4</sub>HexNAc<sub>2</sub>]ITPIR<sup>1307</sup> from SlaA.

561 (E) HCD MS<sup>2</sup> spectra of glycopeptide

562 <sup>1362</sup>EGVN[SuphoQuinovose<sub>1</sub>Hex<sub>4</sub>HexNAc<sub>2</sub>]ASVTSPV VYYSYQAV VAK<sup>1383</sup> from SlaA.

563 (F) HCD MS<sup>2</sup> spectra of glycopeptide <sup>1421</sup>AVGPAISEYPVNLVFTN[SuphoQuinovose<sub>1</sub>Hex<sub>4</sub>

564 HexNAc<sub>2</sub>]VT VEK<sup>1442</sup> from SlaA.

565 **Figure S8:** N-linked glycosylation sites identified from SlaB of *S. tokodaii* by LC-MS/MS

566 analysis (Tryptic digestion and semi-specific cleavage search using Byonic software).

567 (A) HCD MS<sup>2</sup> spectra of glycopeptide

568 <sup>200</sup>GN[SuphoQuinovose<sub>1</sub>Hex<sub>4</sub>HexNAc<sub>2</sub>]QTISLTLK<sup>209</sup> from SlaB.

569 (B) HCD MS<sup>2</sup> spectra of glycopeptide

570 <sup>347</sup>EIETVN[SuphoQuinovose<sub>1</sub>Hex<sub>4</sub>HexNAc<sub>2</sub>]QTVYTL MNEIK<sup>363</sup> from SlaB.

571 (C) HCD MS<sup>2</sup> spectra of glycopeptide

572 <sup>364</sup>SLN[SuphoQuinovose<sub>1</sub>Hex<sub>4</sub>HexNAc<sub>2</sub>]ASISQLSTTL SSTTTEITTLE NDIK<sup>392</sup> from

573 SlaB.

574

575

576

**A**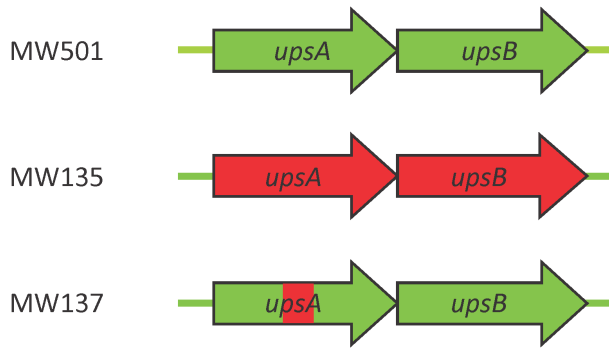**B**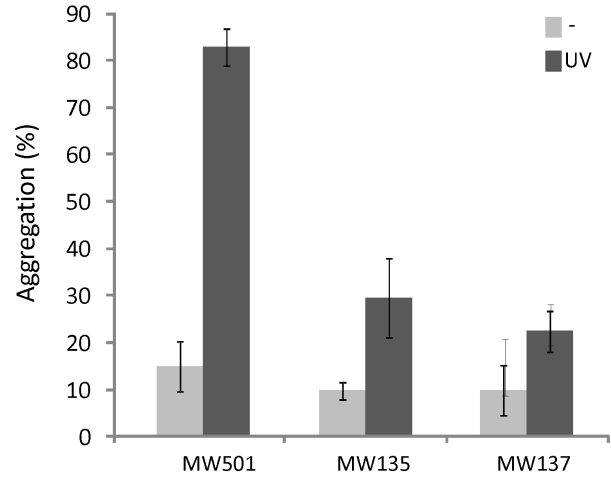**C**

*S. acidocaldarius* MW501  
+ *S. tokodaii*

*S. acidocaldarius*  $\Delta$ *upsAB*  
+ *S. tokodaii*

*S. acidocaldarius* MW135  
+ *S. tokodaii*

*S. acidocaldarius* MW137  
+ *S. tokodaii*

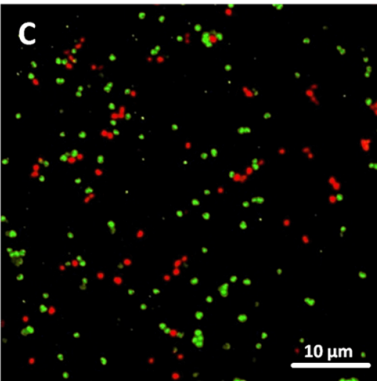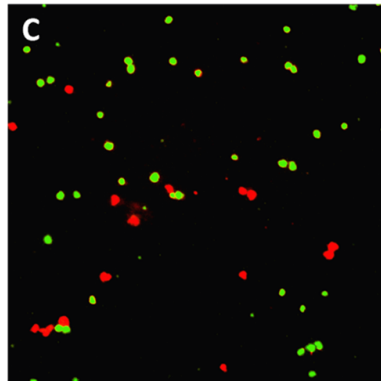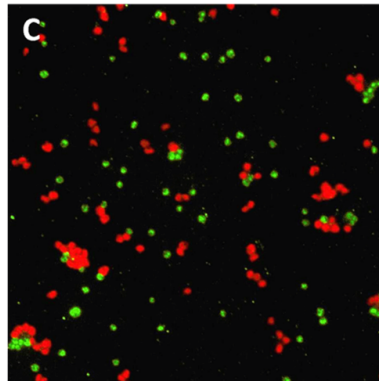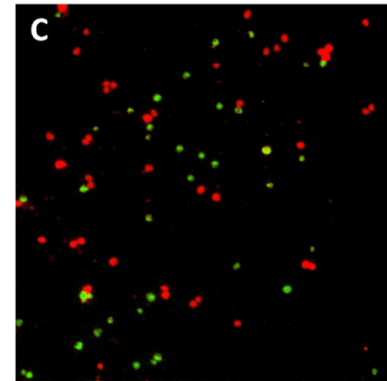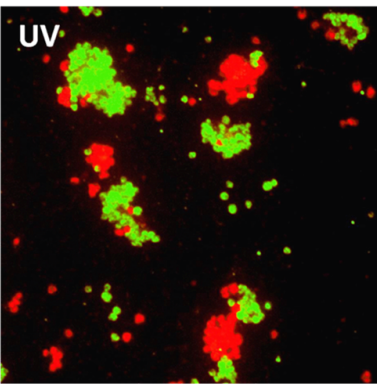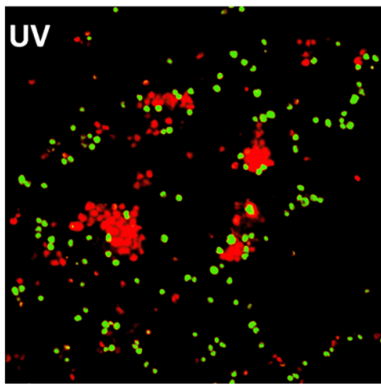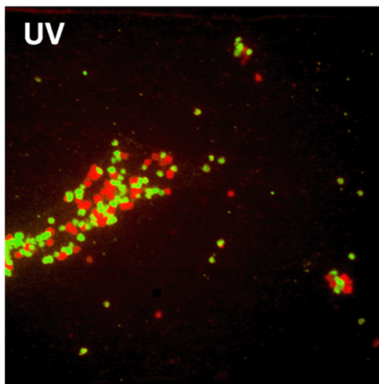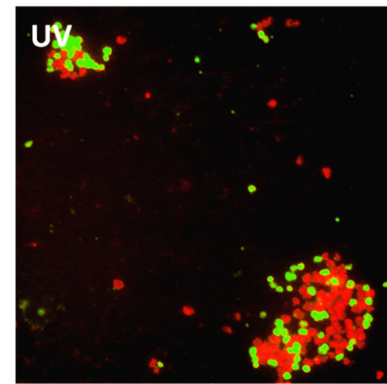

**A**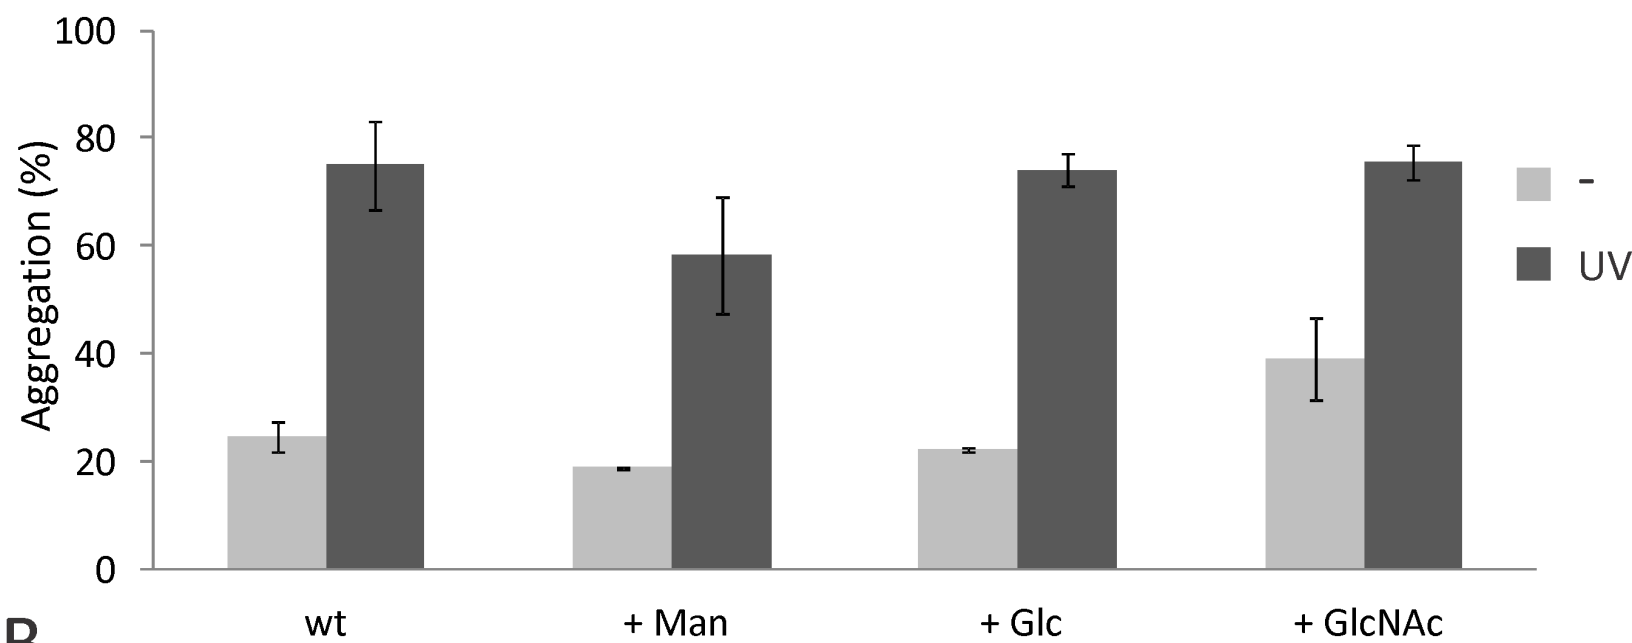**B**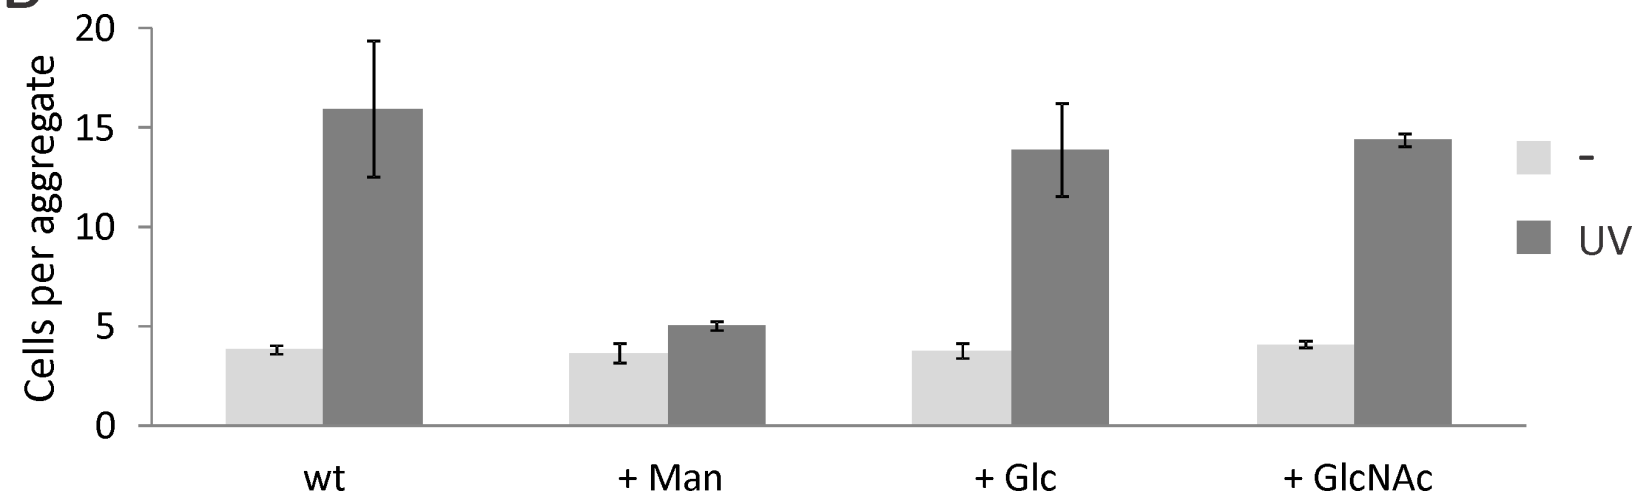

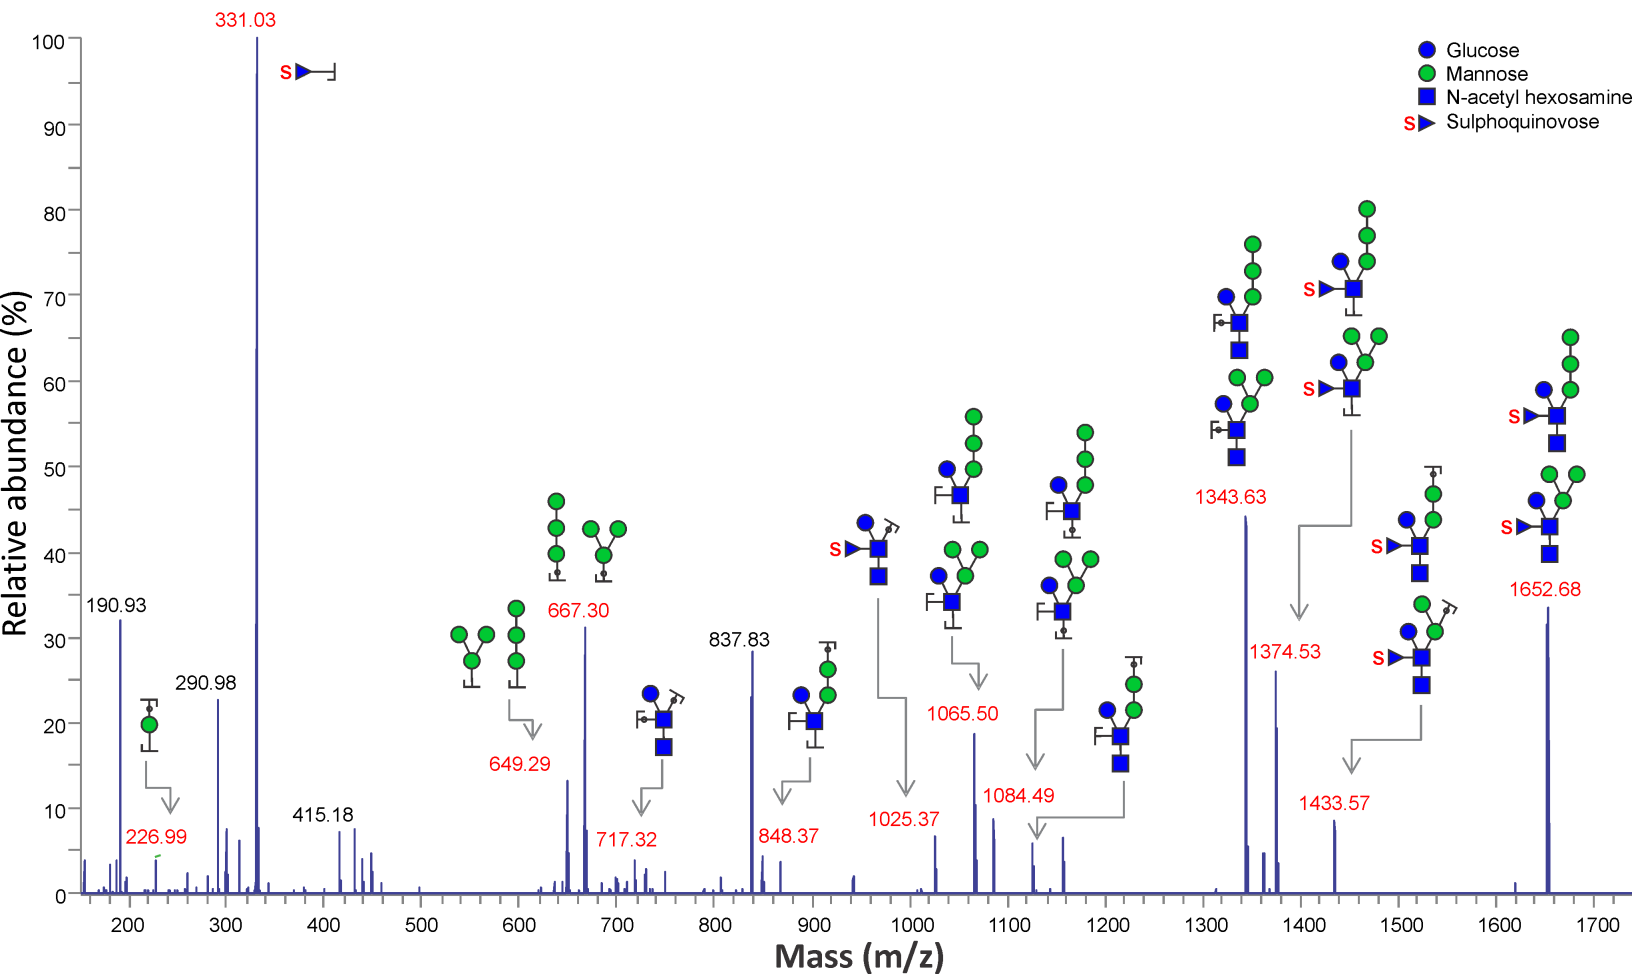

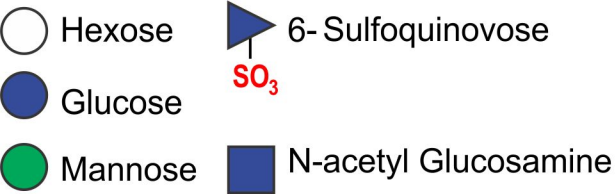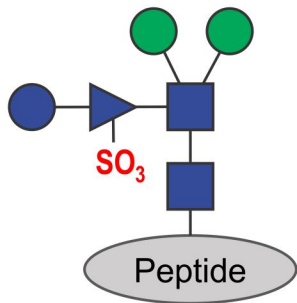

*S. acidocaldarius*

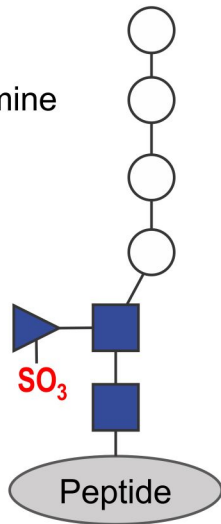

*S. solfataricus*

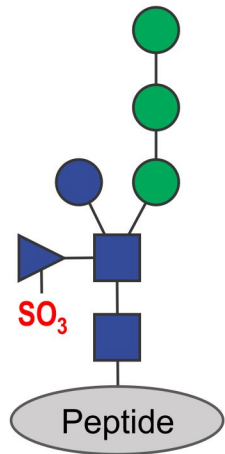

*S. tokodaii*

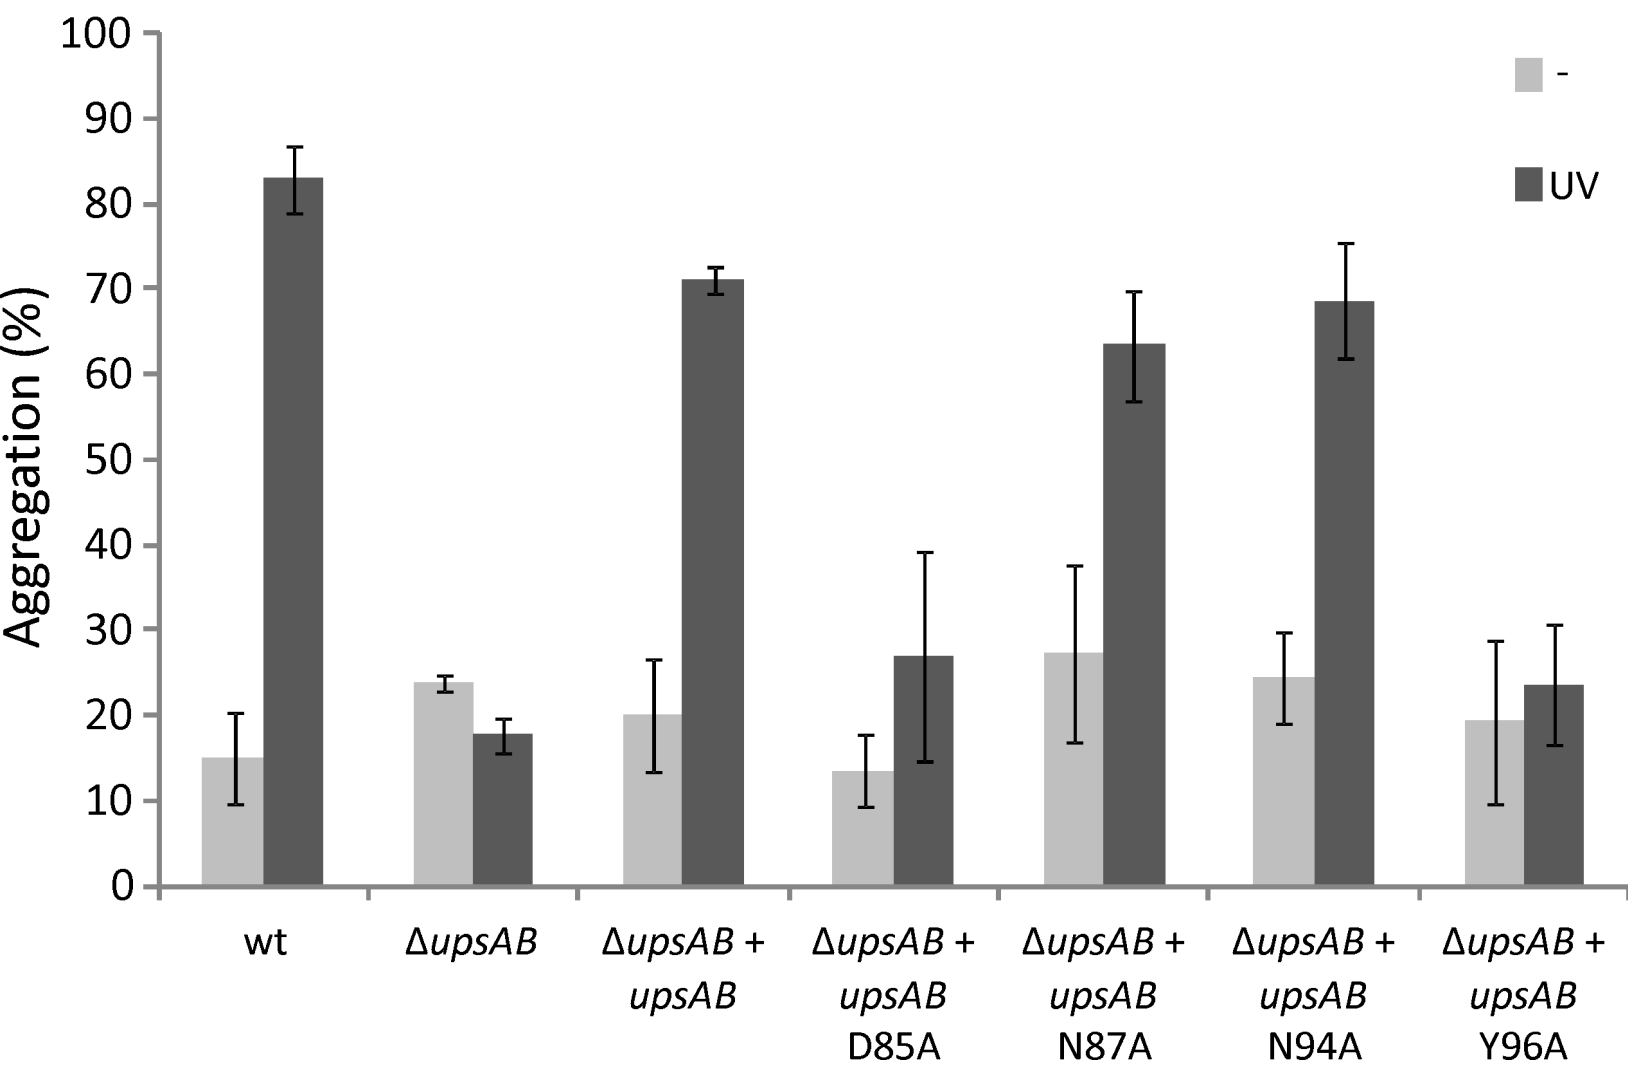

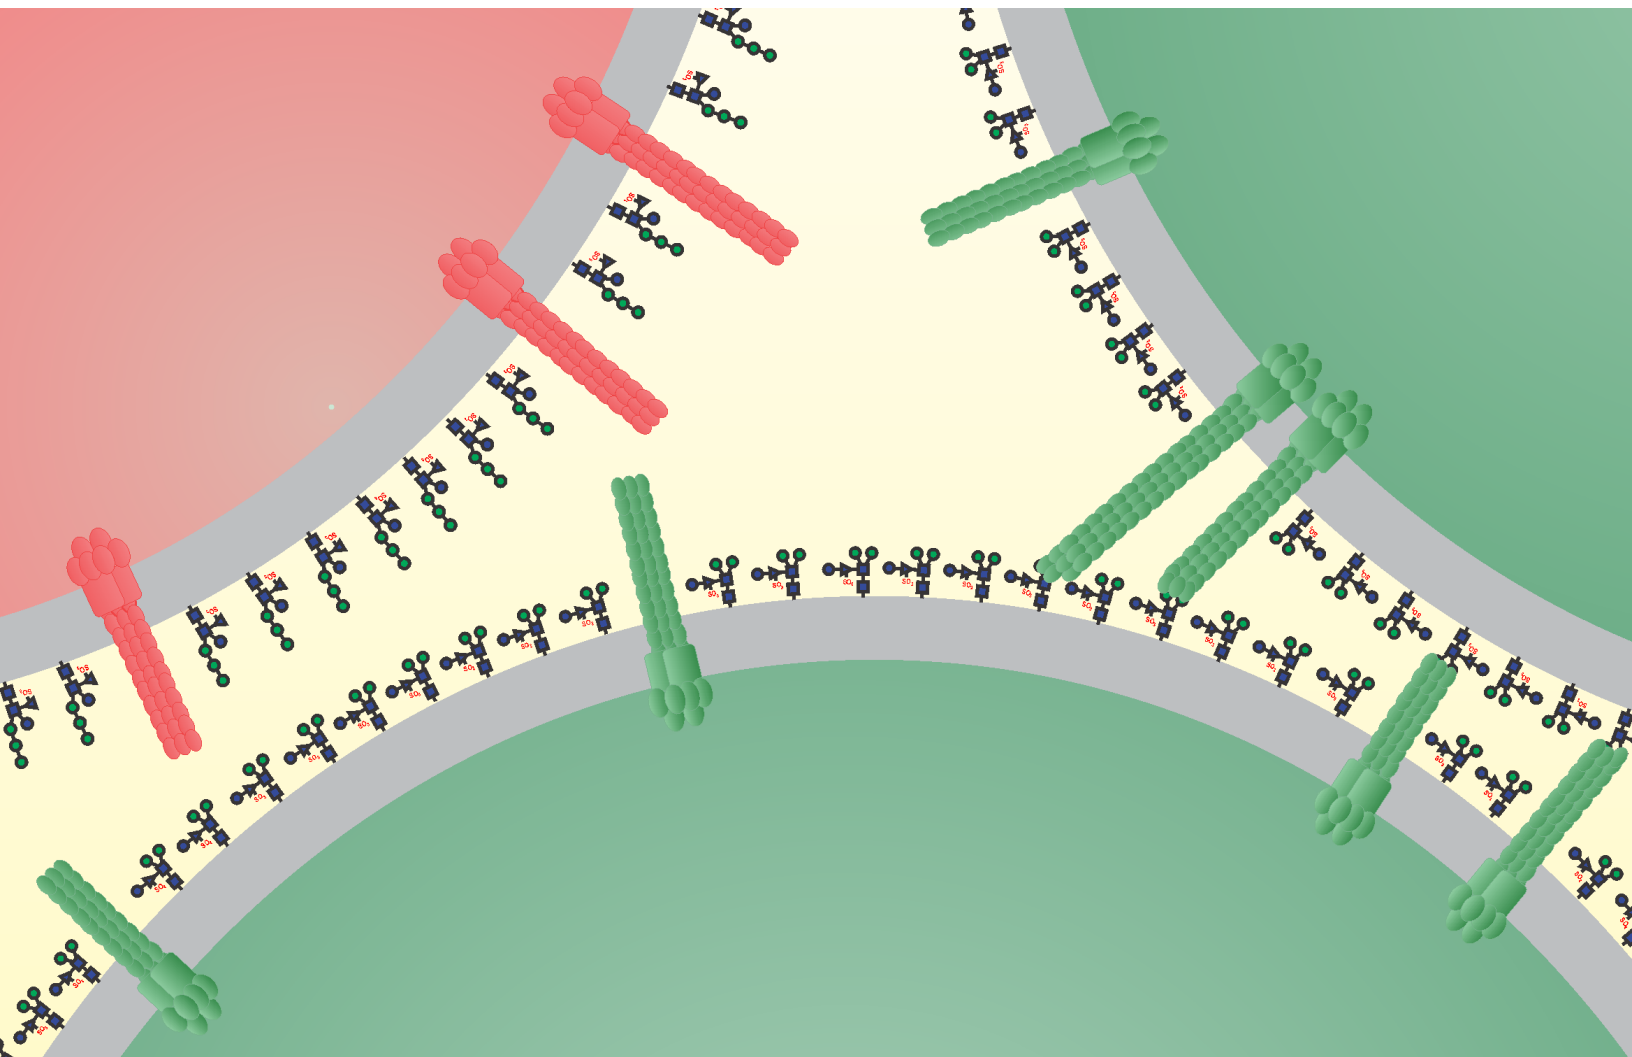

Source: https://www.biorxiv.org/content/10.1101/663898v1.full.pdf
